# Supplementary material for: Exploring narcissism and human- and animal-centered empathy in pet owners
Source: PubMed Central journal article supplement (PMC10098159; doi:10.3389/fpsyg.2023.1087049), 2023-03-30
Supplement: Table_1.pdf [file Table_1.pdf]

## Supplemental Materials

Supplemental Table 1

Regression analyses using narcissistic traits to predict human- and animal-centered empathy, attitude towards animals, and pet attachment.

| Predictors                                                     | <i>B</i> | <i>SE</i> | <i>t</i> | <i>p</i>        | 95% CI       |
|----------------------------------------------------------------|----------|-----------|----------|-----------------|--------------|
| <b>Dependent variable: Human-centered Empathy</b>              |          |           |          |                 |              |
| Agentic Extraversion                                           | .03      | .05       | 0.58     | .584            | [-.07, .12]  |
| Antagonism                                                     | -.19     | .05       | -3.77    | <b>&lt;.001</b> | [-.28, -.09] |
| Narcissistic Neuroticism                                       | .01      | .05       | 0.15     | .879            | [-.08, .10]  |
| Gender                                                         | -.18     | .10       | -1.86    | .064            | [-.37, .01]  |
| Animal-centered empathy                                        | .40      | .05       | 8.48     | <b>&lt;.001</b> | [.31, .49]   |
| <b>Dependent variable: Animal-centered Empathy</b>             |          |           |          |                 |              |
| Agentic Extraversion                                           | .03      | .06       | 0.44     | .661            | [-.09, .14]  |
| Antagonism                                                     | -.14     | .06       | -2.27    | <b>.024</b>     | [-.26, -.02] |
| Narcissistic Neuroticism                                       | .15      | .05       | 2.81     | <b>.005</b>     | [.05, .25]   |
| Gender                                                         | -.43     | .11       | -3.85    | <b>&lt;.001</b> | [-.65, -.21] |
| Human-centered empathy                                         | .56      | .07       | 8.48     | <b>&lt;.001</b> | [.43, .70]   |
| <b>Dependent variable: Attitudes toward Animals</b>            |          |           |          |                 |              |
| Agentic Extraversion                                           | .06      | .07       | 0.97     | .332            | [-.07, .19]  |
| Antagonism                                                     | -.25     | .06       | -3.90    | <b>&lt;.001</b> | [-.37, -.12] |
| Narcissistic Neuroticism                                       | .23      | .06       | 3.93     | <b>&lt;.001</b> | [.12, .35]   |
| Gender                                                         | -.59     | .12       | -4.86    | <b>&lt;.001</b> | [-.83, -.35] |
| <b>Dependent variable: Emotion Regulation – Pet Attachment</b> |          |           |          |                 |              |
| Agentic Extraversion                                           | .04      | .07       | 0.60     | .550            | [-.10, .18]  |
| Antagonism                                                     | -.12     | .07       | -1.79    | .075            | [-.26, .01]  |
| Narcissistic Neuroticism                                       | .15      | .06       | 2.36     | <b>.019</b>     | [.02, .27]   |
| Gender                                                         | -.68     | .13       | -5.26    | <b>&lt;.001</b> | [-.94, -.43] |
| <b>Dependent variable: Love – Pet Attachment</b>               |          |           |          |                 |              |
| Agentic Extraversion                                           | .09      | .06       | 1.38     | .169            | [-.04, .21]  |
| Antagonism                                                     | -.09     | .06       | -1.54    | .124            | [-.21, .03]  |
| Narcissistic Neuroticism                                       | .04      | .06       | .77      | .443            | [-.07, .15]  |
| Gender                                                         | -.70     | .12       | -6.10    | <b>&lt;.001</b> | [-.92, -.47] |
| <b>Dependent variable: Negative Impact – Pet Attachment</b>    |          |           |          |                 |              |
| Agentic Extraversion                                           | .00      | .07       | -.01     | .996            | [-.15, .14]  |
| Antagonism                                                     | -.15     | .07       | -2.13    | <b>.034</b>     | [-.30, -.01] |
| Narcissistic Neuroticism                                       | -.08     | .07       | -1.21    | .226            | [-.21, .05]  |

|        |     |     |      |      |             |
|--------|-----|-----|------|------|-------------|
| Gender | .09 | .14 | 0.65 | .517 | [-.18, .36] |
|--------|-----|-----|------|------|-------------|

**Dependent variable: Personal Growth – Pet Attachment**

|                          |      |     |       |             |              |
|--------------------------|------|-----|-------|-------------|--------------|
| Agentic Extraversion     | .02  | .07 | 0.23  | .819        | [-.13, .16]  |
| Antagonism               | -.07 | .07 | -1.06 | .292        | [-.21, .06]  |
| Narcissistic Neuroticism | -.09 | .07 | 1.32  | .186        | [-.04, .22]  |
| Gender                   | -.32 | .13 | -2.36 | <b>.019</b> | [-.58, -.05] |

---

Note. All variables were standardized as z-scores. Gender is coded 1 = male, 0 = female.
